# Supplementary material
Source: PubMed Central journal article supplement (PMC9802286)
Supplement: deac183_supplementary_figure_s1.pdf [file deac183_supplementary_figure_s1.pdf]

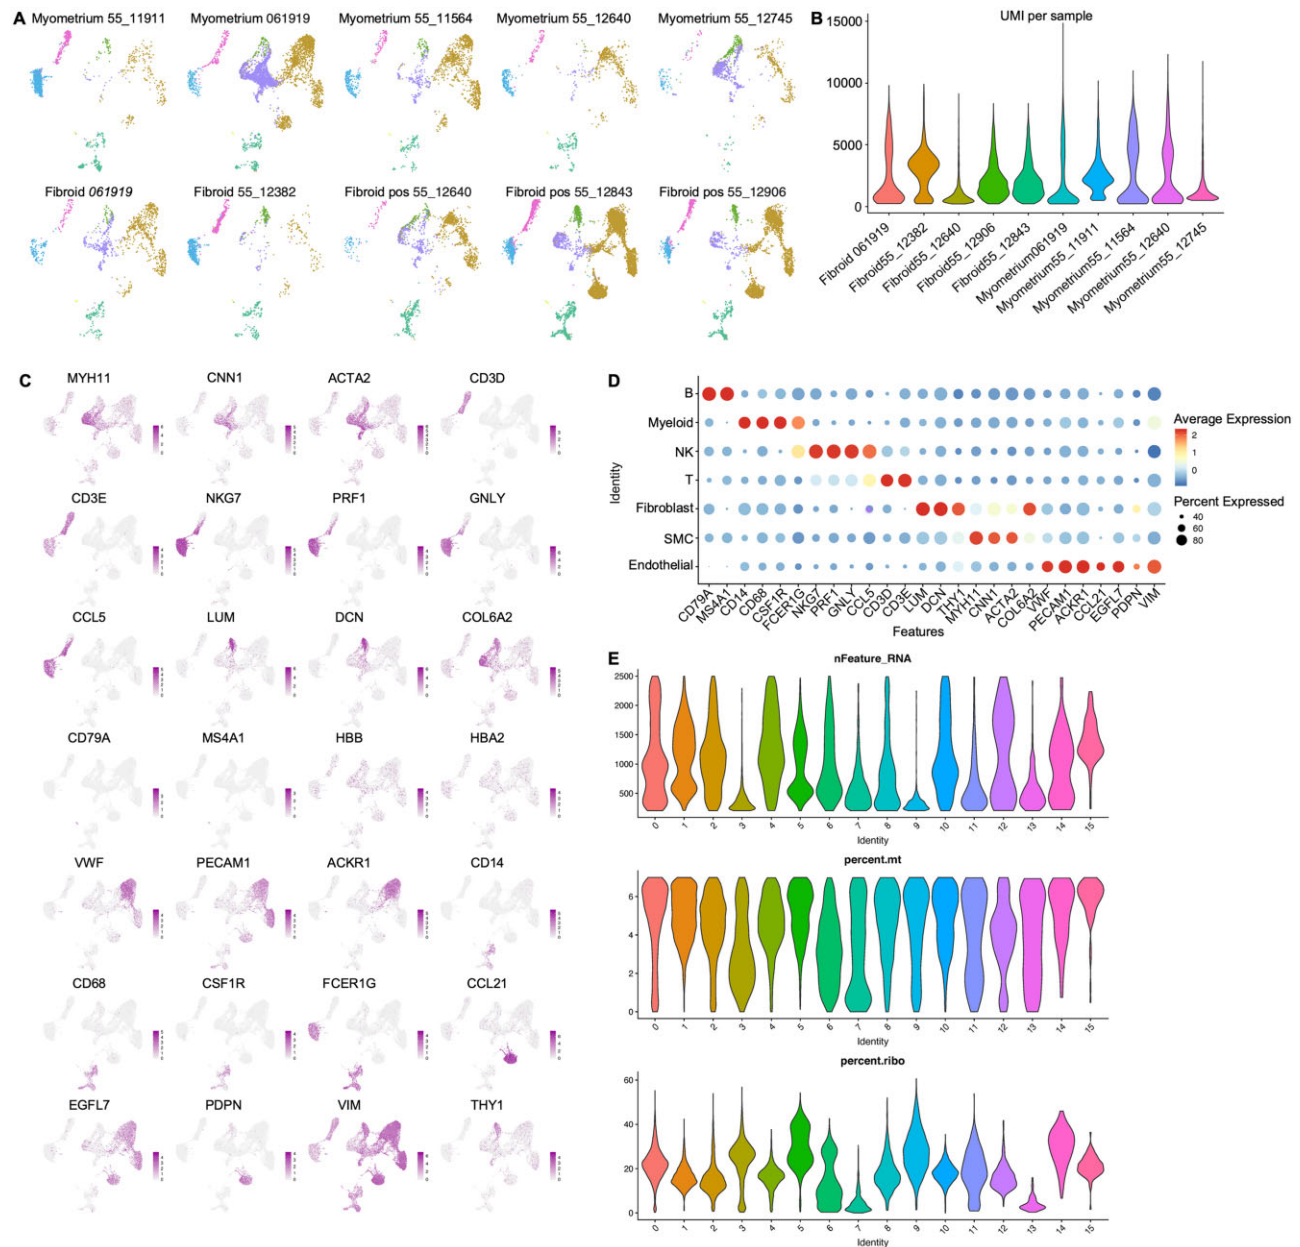

**Supplementary Figure S1. Quality control and annotations of the myometrium cells.** (A) UMAP showing the cell types present in all individual patient samples including myometrium and *MED12*-variant positive leiomyoma. (B) Violin plot showing UMI per sample. (C) Feature plots showing the expression of the lineage markers of the cell types (deep purple: high; light purple: low). (D) Dot plots showing the lineage signatures per cell type. The dot size indicates the percentage of expression, and the color of the dot is indicative of the average expression of the gene (red: high, blue: low). (E) Violin plots of the number of genes, number of total counts and percentage mitochondrial genes expressed in the across 25 605 cells in myometrium and *MED12*-variant positive leiomyoma samples.
