# Supplementary material
Source: PubMed Central journal article supplement (PMC9802286)
Supplement: deac183_supplementary_figure_s2.pdf [file deac183_supplementary_figure_s2.pdf]

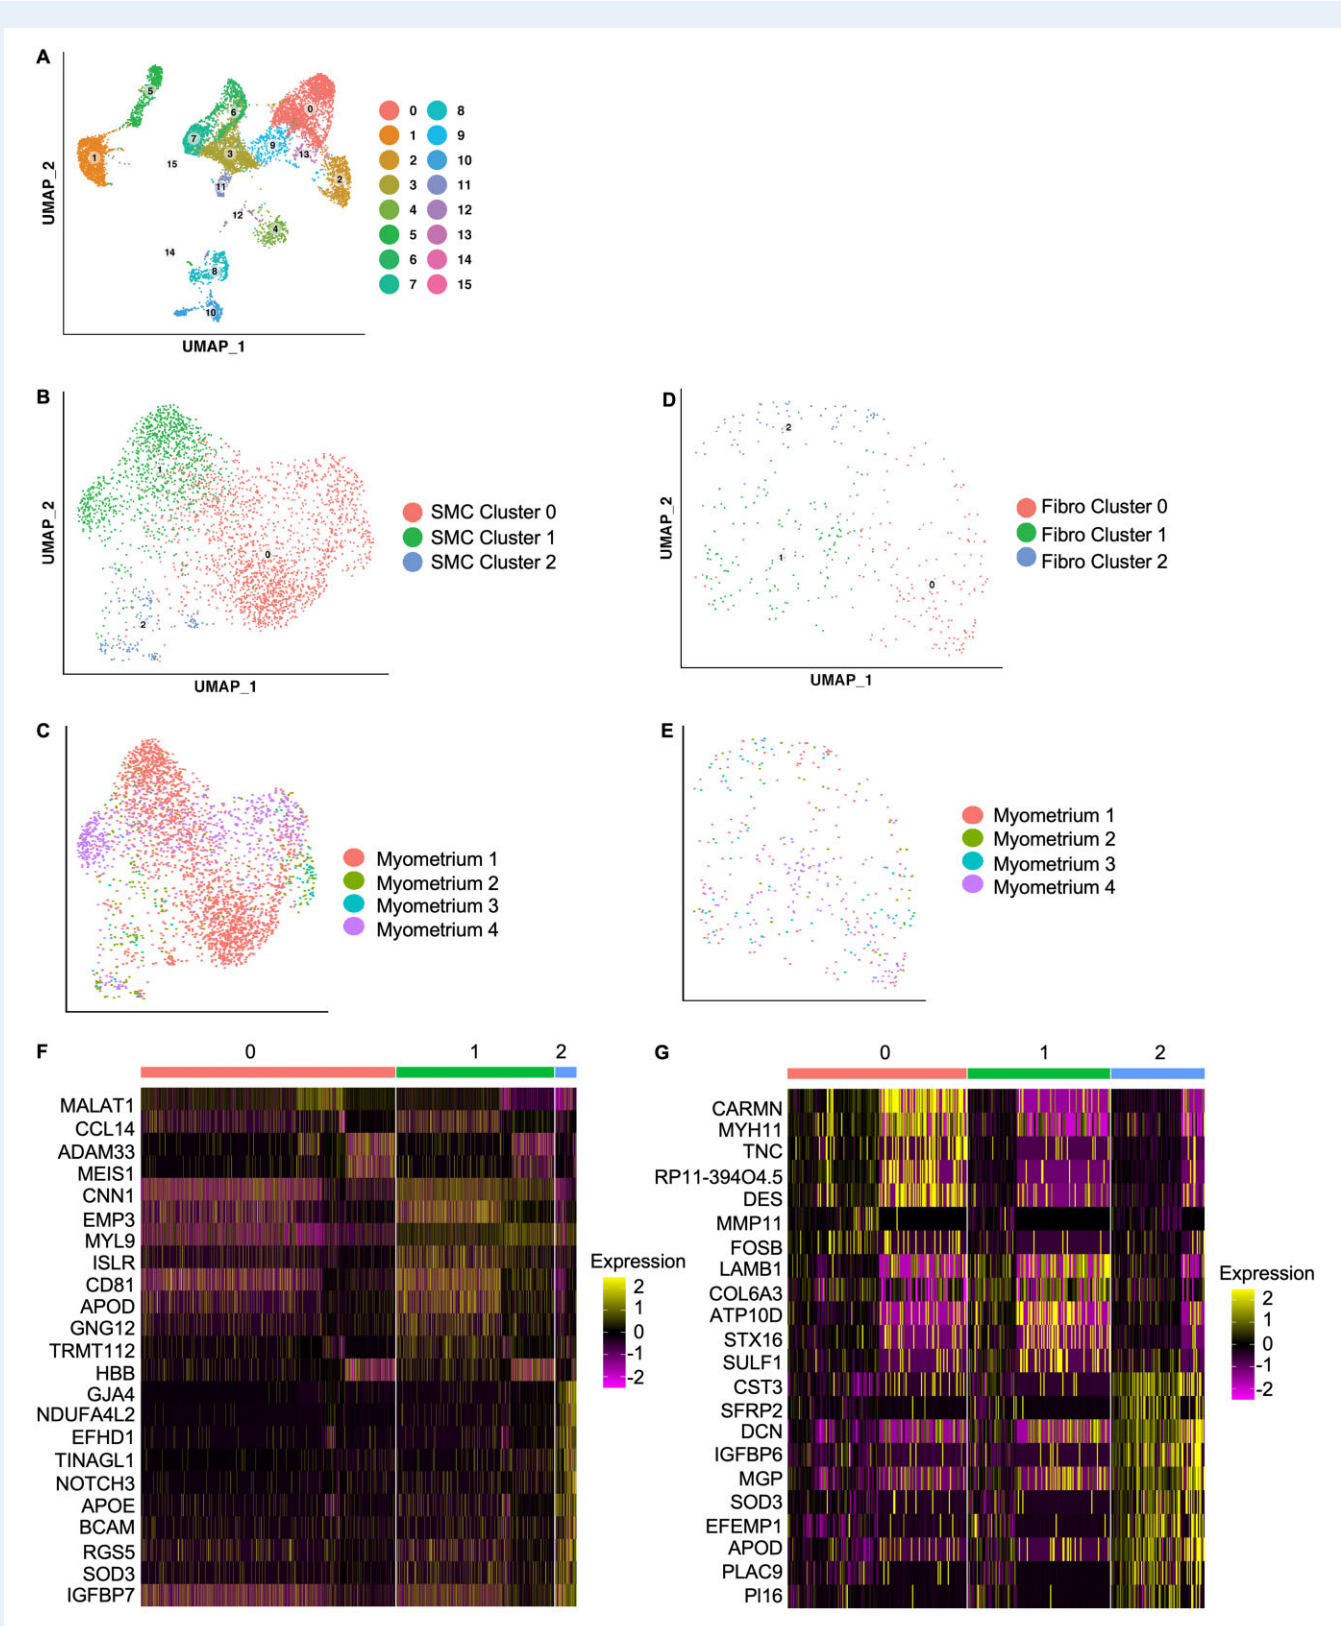

**Supplementary Figure S2. Intracellular heterogeneity in the myometrium.** (A) UMAP showing all cell clusters present in the myometrium dataset. (B) UMAP showing the clusters of smooth muscle cells (SMCs). (C) UMAP showing the SMC clusters per individual patient sample. (D) UMAP showing the clusters of fibroblasts. (E) UMAP showing the fibroblast cell clusters per individual patient sample. (F) Heatmap of the SMC clusters in myometrium. (G) Heatmap of the fibroblast cell clusters in myometrium. In heatmaps, the colored bar on the top represents the cluster number. Columns denote cells; rows denote genes.
