# Supplementary material
Source: PubMed Central journal article supplement (PMC9802286)
Supplement: deac183_supplementary_figure_s3.pdf [file deac183_supplementary_figure_s3.pdf]

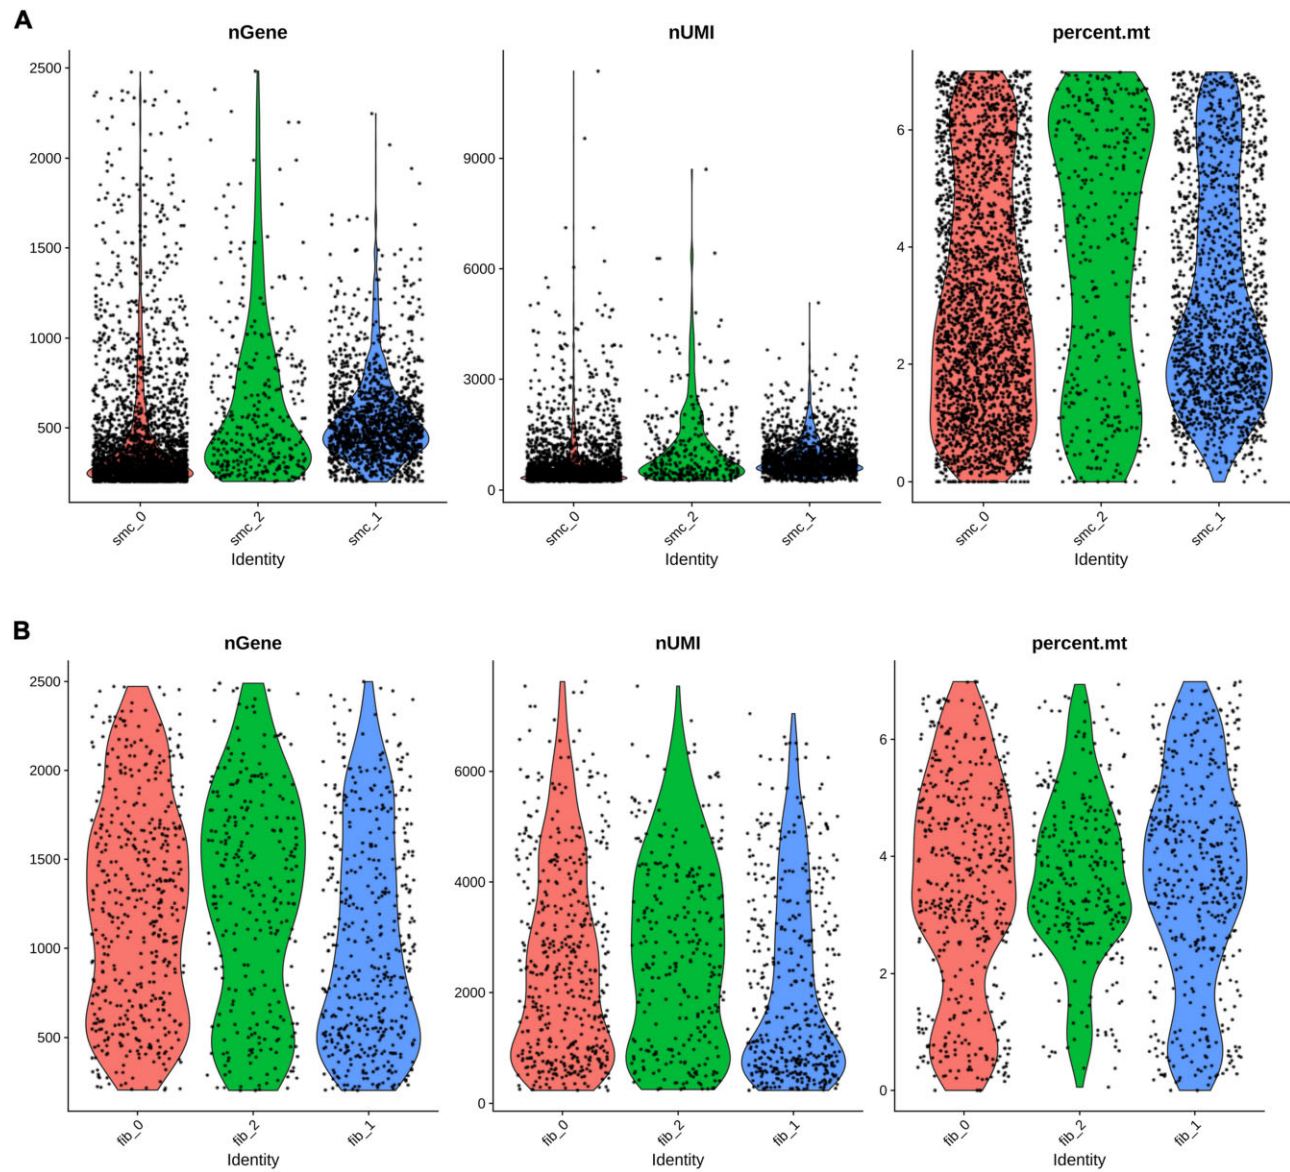

**Supplementary Figure S3. Quality control of the smooth muscle and fibroblast subtypes.** (A) Violin plots showing features count, UMI and mitochondrial count per sample for smooth muscle subtypes. (B) Violin plots showing features count, UMI and mitochondrial count per sample for fibroblast subtypes.
