# Supplementary material
Source: PubMed Central journal article supplement (PMC9802286)
Supplement: deac183_supplementary_figure_s4.pdf [file deac183_supplementary_figure_s4.pdf]

human reproduction SUPPLEMENTARY DATA

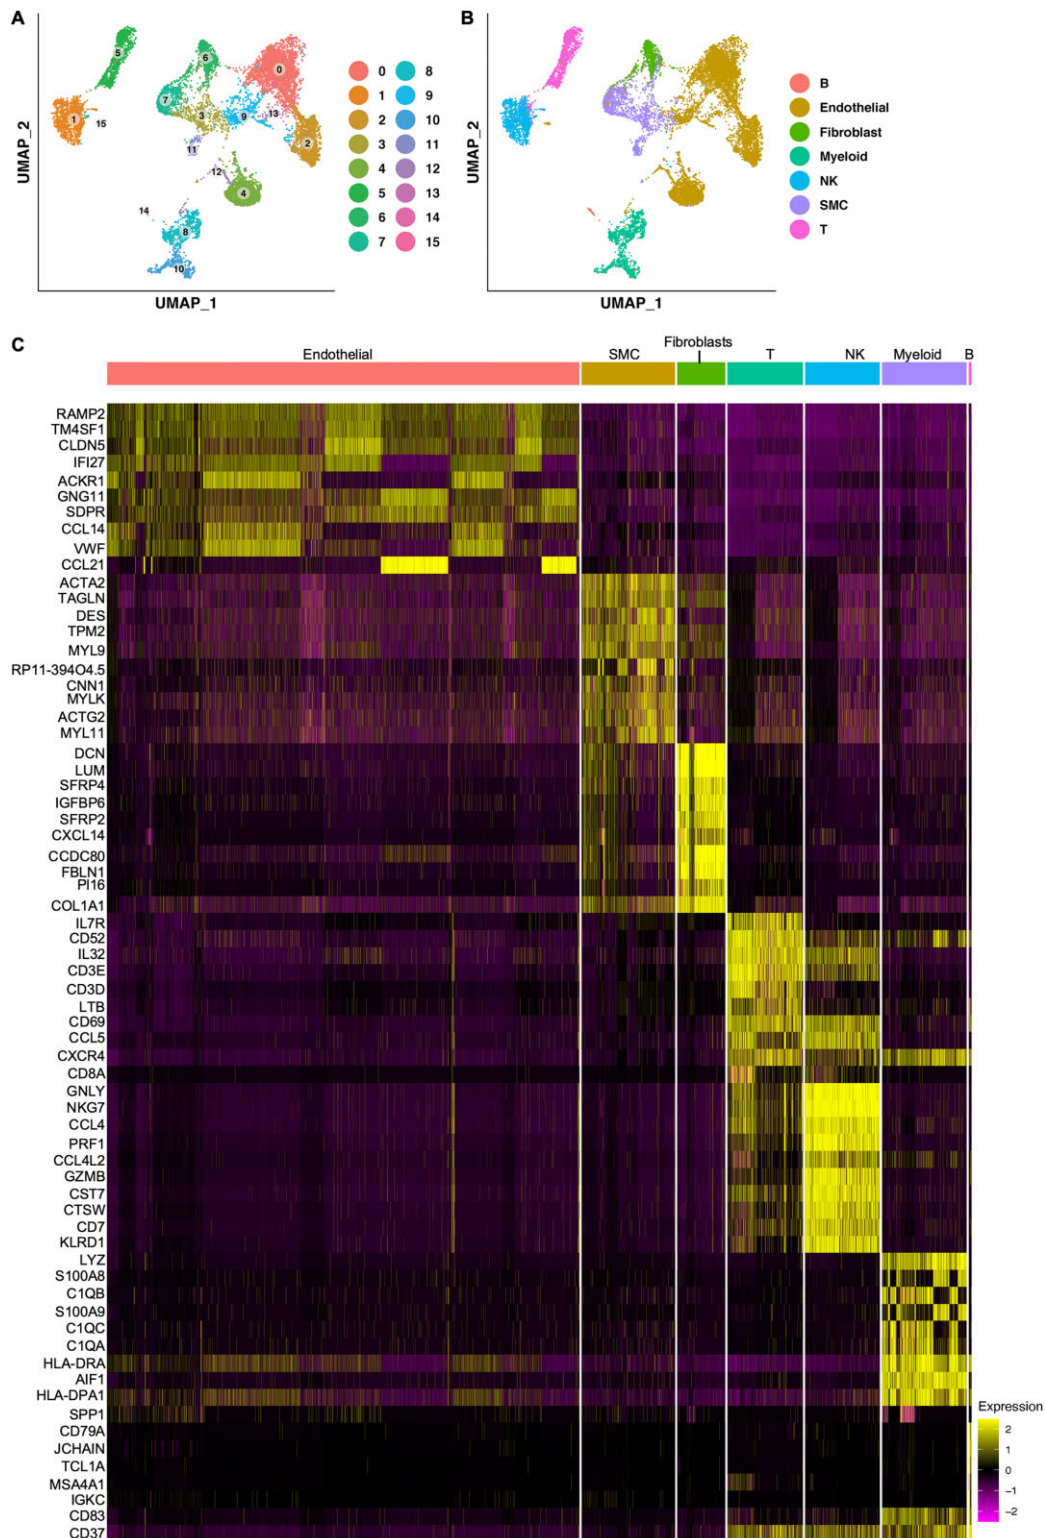

**Supplementary Figure S4. Cell clusters in leiomyomas.** (A) UMAP showing different cell clusters present in uterine leiomyomas. (B) UMAP showing the annotation of cell clusters. (C) Heatmap showing the top ten genes used for cluster identification. Columns denote cells, rows denote genes.
