# Supplementary material
Source: PubMed Central journal article supplement (PMC9802286)
Supplement: deac183_supplementary_figure_s5.pdf [file deac183_supplementary_figure_s5.pdf]

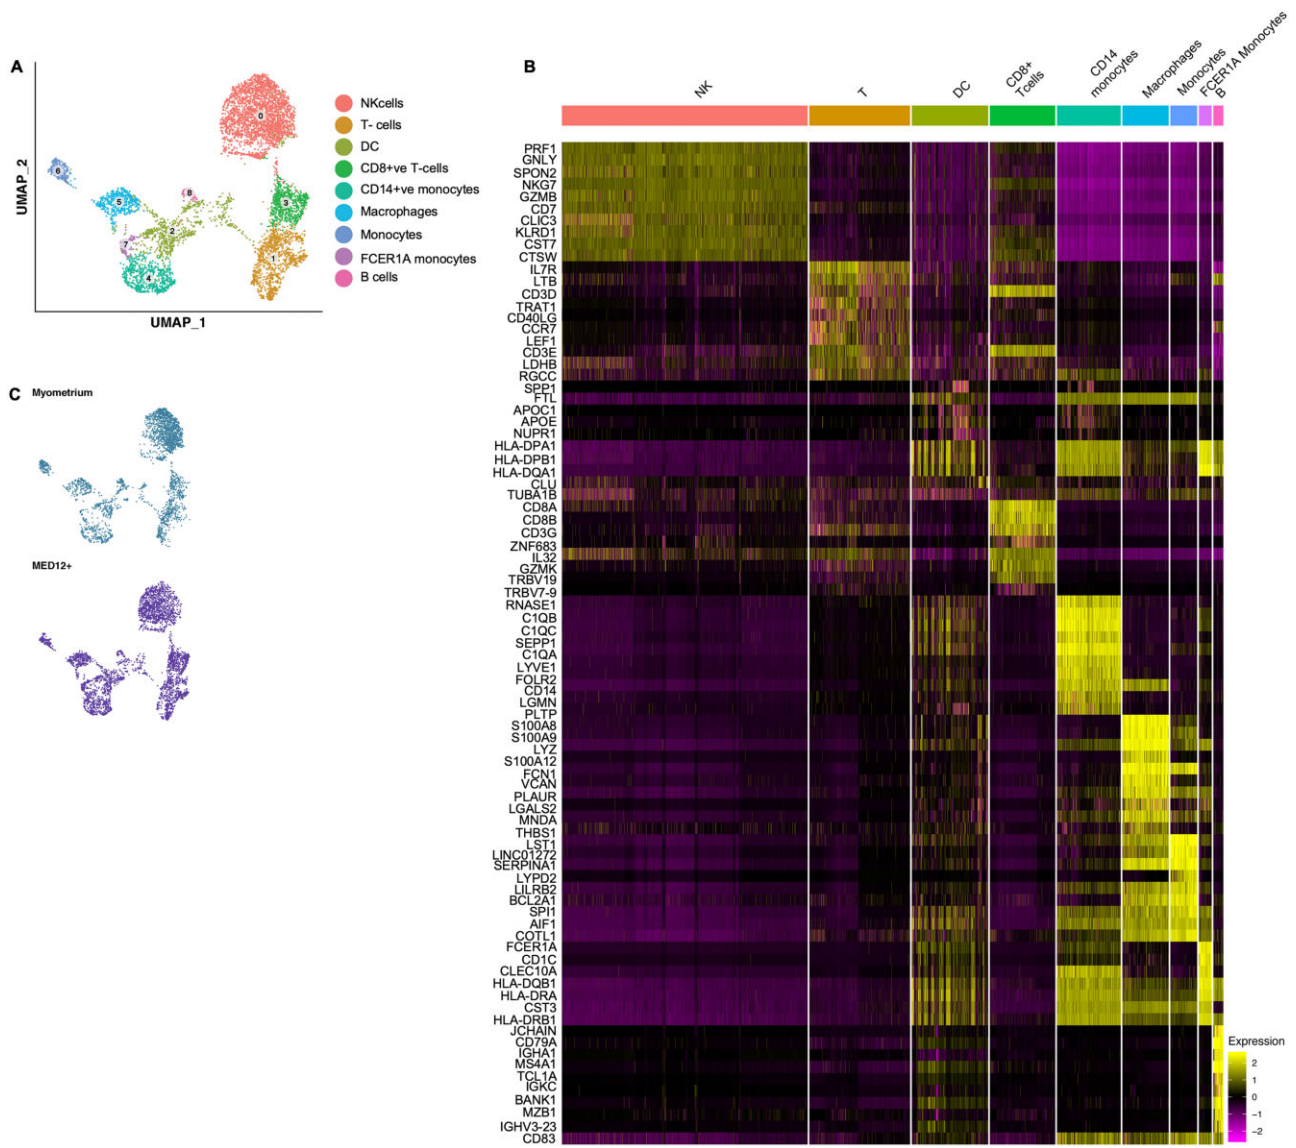

**Supplementary Figure S5. Immune cell infiltration is dependent on the genotype of the uterine leiomyoma.** (A) UMAP showing the immune cell clusters. (B) Heatmap of endothelial cell clusters. The colored bar on the top represents the cluster number. Columns denote cells; rows denote genes. (C) UMAP showing the cluster annotation per condition: myometrium and *MED12*-variant positive leiomyomas.
