# Supplementary material
Source: PubMed Central journal article supplement (PMC9802286)
Supplement: deac183_supplementary_figure_s6.pdf [file deac183_supplementary_figure_s6.pdf]

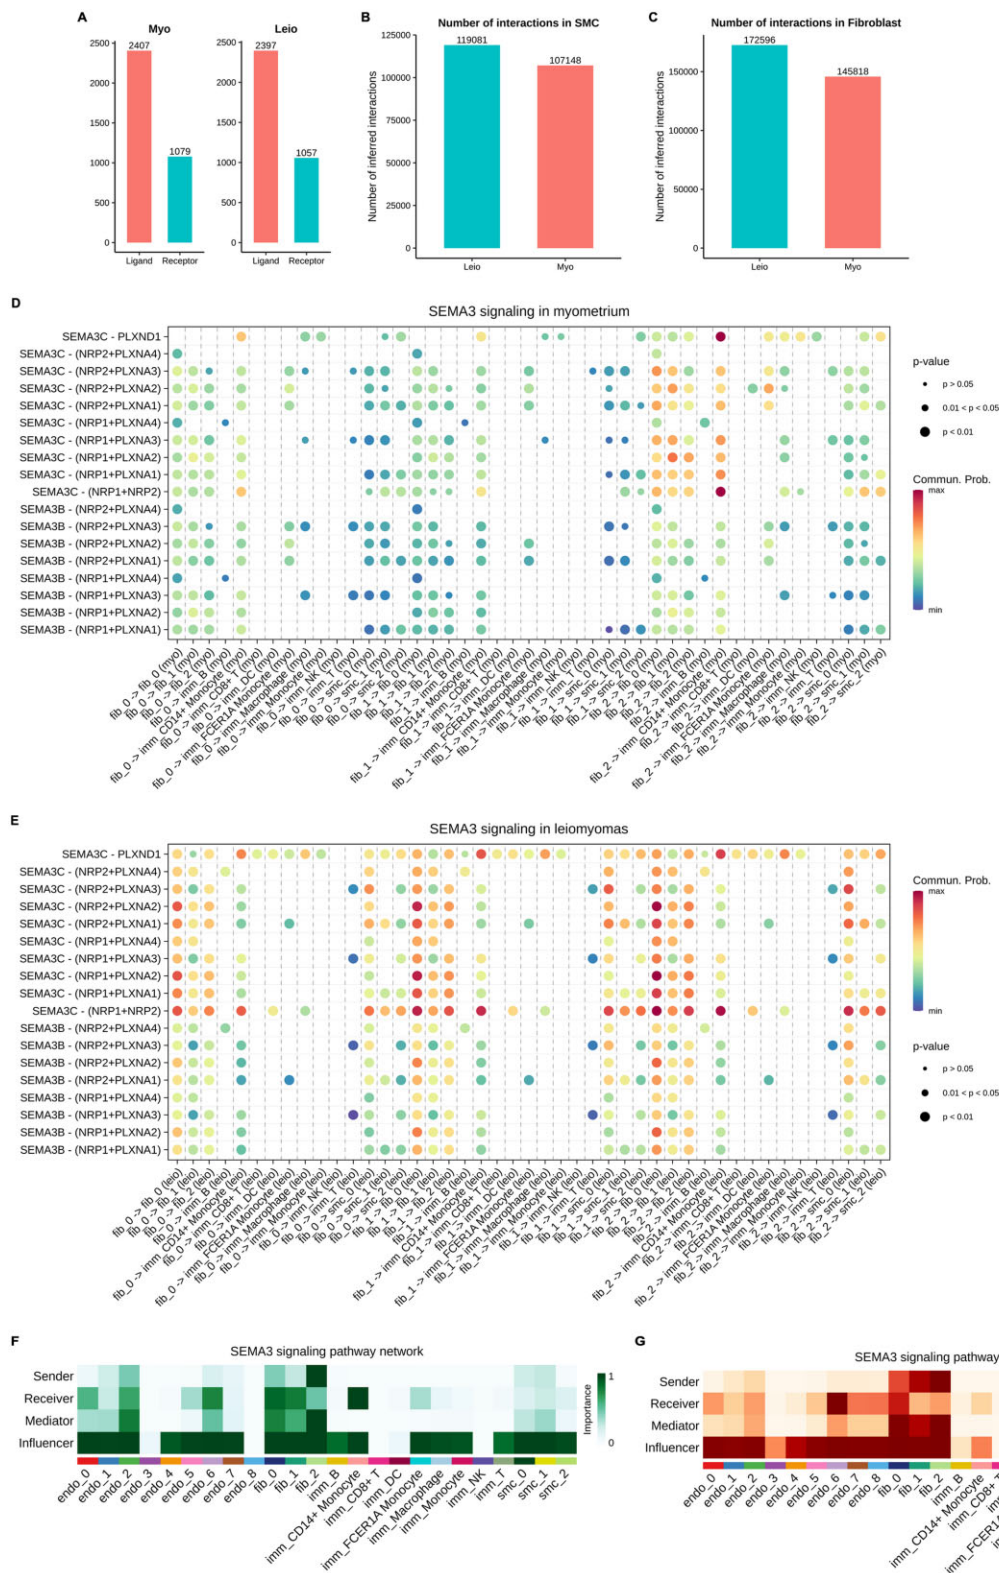

**Supplementary Figure S6. SEMA 3 pathway is upregulated in leiomyomas.** (A) Differential expression of total ligands and receptors in leiomyomas compared to myometrium ( $P$ -value < 0.05). (B) Total number of smooth muscle cell (SMC) interactions in leiomyomas compared to myometrium. (C) The total number of fibroblast–cell interactions in leiomyomas compared to the myometrium. (D, E) Dot plot showing the key receptor–ligand pairs of the SEMA3 signaling pathway in the (D) myometrium and (E) leiomyomas. (F, G) Heatmaps show the relative importance of each cell group based on the computed four network centrality measures of ECM signaling network in (F) myometrium and (G) leiomyoma.
