# Supplementary material
Source: PubMed Central journal article supplement (PMC9802286)
Supplement: deac183_supplementary_figure_s7.pdf [file deac183_supplementary_figure_s7.pdf]

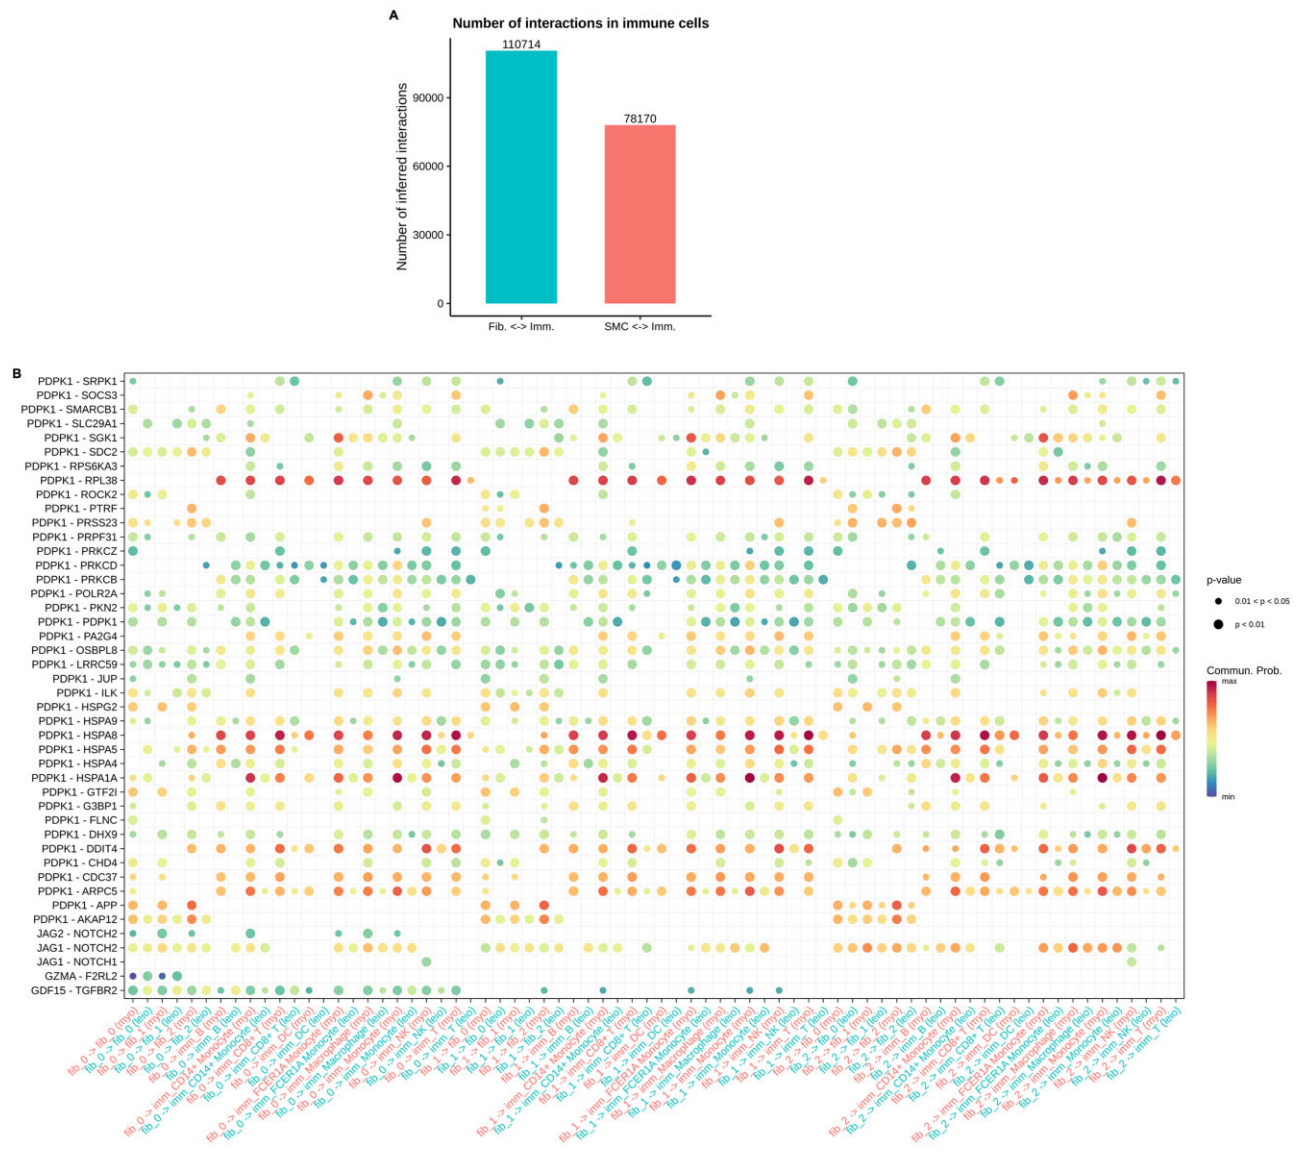

**Supplementary Figure S7. Fibroblast and immune cell interactions.** (A) Bar plot showing the number of interactions between fibroblasts and immune cells compared to smooth muscle cells (SMCs) and immune cells in *MED12*-variant positive leiomyomas. (B) Dot plot showing the key signaling pathway receptor–ligand interactions facilitating the fibroblast and immune cell interactions in myometrium and leiomyomas. The color indicates the communication probability and the dot size indicates the *P*-value.
