# Supplementary material
Source: PubMed Central journal article supplement (PMC9802286)
Supplement: deac183_supplementary_figure_s8.pdf [file deac183_supplementary_figure_s8.pdf]

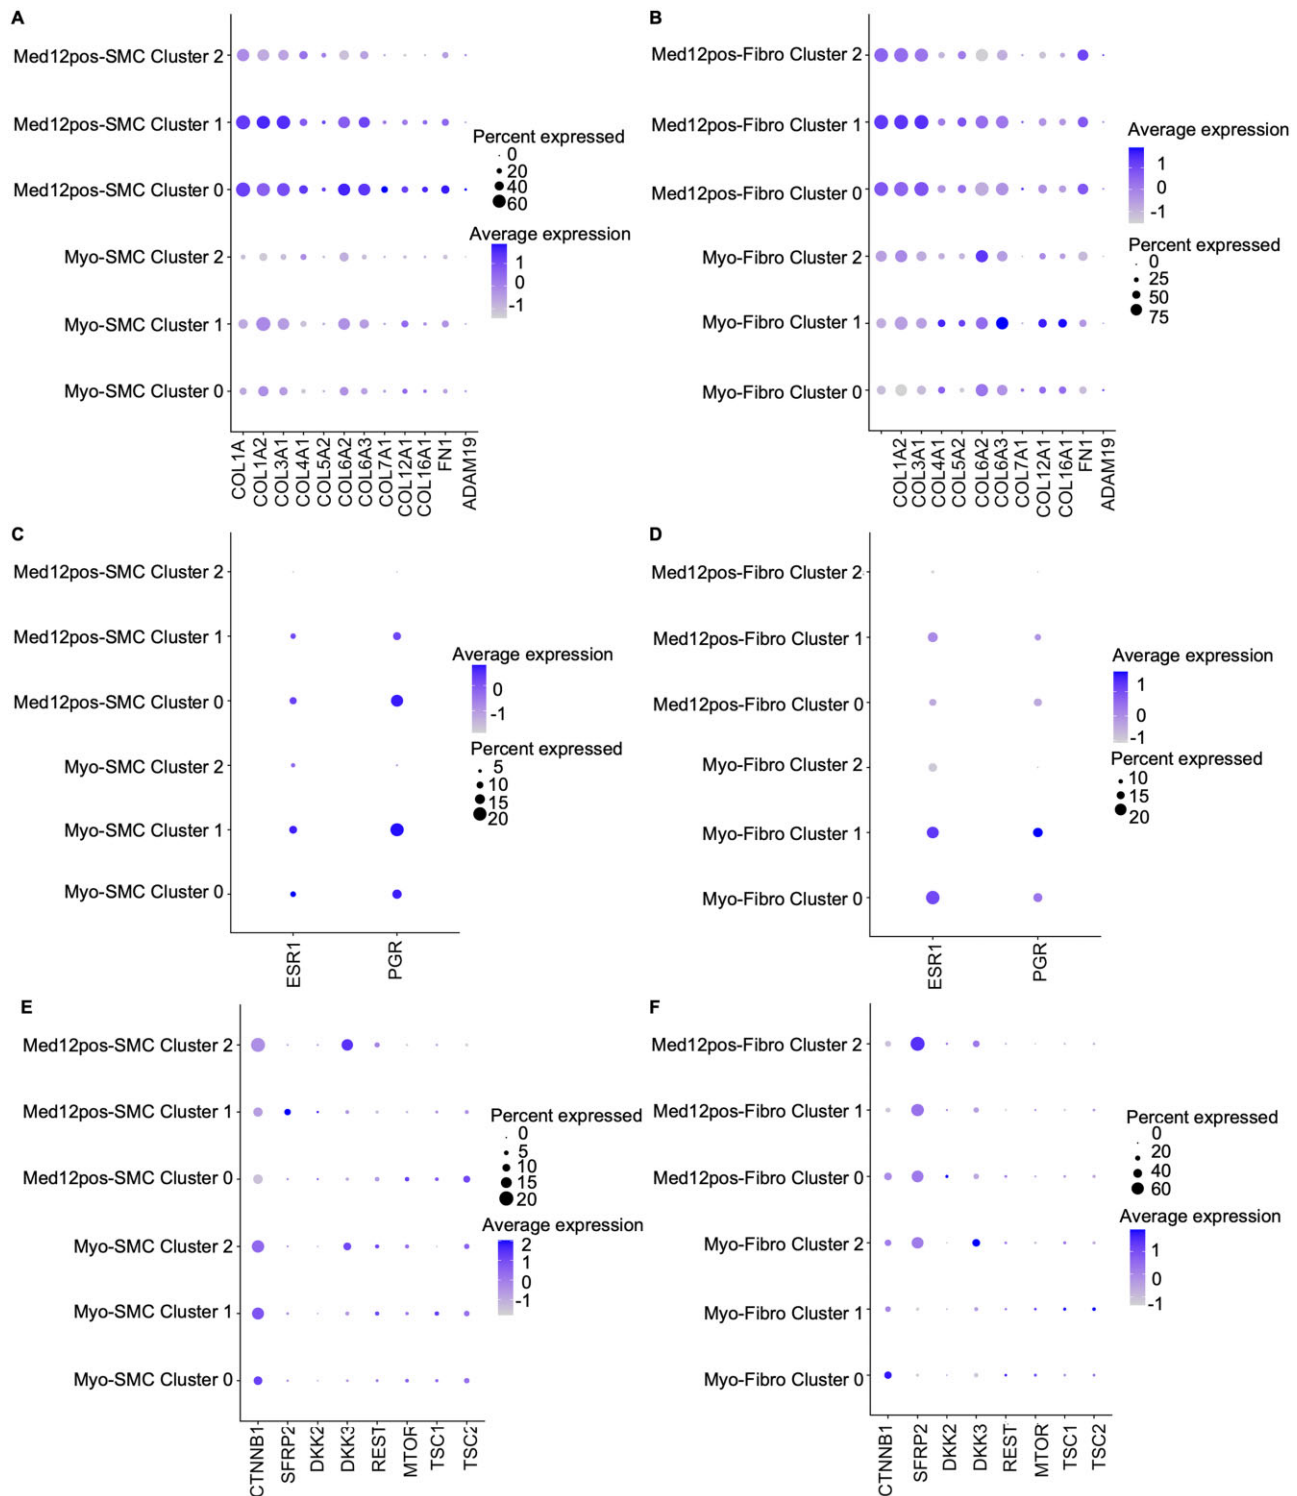

**Supplementary Figure S8. Expression of ECM, ovarian receptor and signaling pathway genes in leiomyoma and myometrium cell population. (A, B)** Dot plot showing the average expression of collagen genes in smooth muscle and fibroblast cell populations in *MED12*-variant positive leiomyomas and myometrium. **(C, D)** Dot plot showing the expression of ESR and PGR in smooth muscle and fibroblast cell populations in *MED12*-variant positive leiomyomas and myometrium. **(E, F)** Dot plot showing the expression of Wnt signaling and mTOR signaling pathway components in smooth muscle and fibroblast cell populations in *MED12*-variant positive leiomyomas and myometrium. The color bar indicates the average expression, and the size of the dot signifies the percentage of cells expressing the gene.
